# Supplementary material
Source: PubMed Central journal article supplement (PMC4492371)
Supplement: 10.1534_115.175851_genetics.115.175851-2.pdf [file 10.1534_115.175851_genetics.115.175851-2.pdf]

**Table S1** List of proteins induced by serotonin in *C. elegans* that were identified by hierarchical clustering of fraction labeled values. Relationships of proteins within these groups were explored by KEGG pathways analysis. (A) Proteins in which the increase in fraction labeled were highest. (B) Proteins in which the increase in fraction labeled were lower. Genes in bold extend lifespan when suppressed by RNAi and thus are likely to be age-promoting when highly expressed.

**Table S1A.** Highest Fraction Labeled

| UniProt ID         | WB Gene Name    |
|--------------------|-----------------|
| ARF12_CAEEL        | arf-1           |
| BAF1_CAEEL         | baf-1           |
| BTF3_CAEEL         | icd-1           |
| CGL2_CAEEL         | cth-2           |
| CH60_CAEEL         | hsp-60          |
| CHIT_CAEEL         | cht-1           |
| CLC87_CAEEL        | clcc-87         |
| CLC91_CAEEL        | clcc-91         |
| CPG2_CAEEL         | cpg-2           |
| CPG3_CAEEL         | cpg-3           |
| CPR6_CAEEL         | cpr-6           |
| CYP1_CAEEL         | cyn-1           |
| CYP2_CAEEL         | cyn-2           |
| CYP3_CAEEL         | cyn-3           |
| CYP5_CAEEL         | cyn-5           |
| CYP6_CAEEL         | cyn-6           |
| CYP7_CAEEL         | cyn-7           |
| DPY30_CAEEL        | dpy-30          |
| EF1A_CAEEL         | eft-3           |
| <b>EF1B1_CAEEL</b> | <b>eef-1B.1</b> |
| EF1B2_CAEEL        | eef-1B.2        |
| <b>EF2_CAEEL</b>   | <b>eef-2</b>    |
| ETFA_CAEEL         | F27D4.1         |
| FABP2_CAEEL        | lbp-2           |
| FABP9_CAEEL        | lbp-9           |
| G3P1_CAEEL         | gpd-1           |
| GBLP_CAEEL         | rack-1          |
| GLC7A_CAEEL        | gsp-1           |
| GLYC_CAEEL         | mel-32          |
| GST7_CAEEL         | gst-7           |
| H2B1_CAEEL         | his-11          |
| H4_CAEEL           | his-1           |
| HSP7A_CAEEL        | hsp-1           |

|                  |              |
|------------------|--------------|
| HSP7D_CAEEL      | hsp-4        |
| HSP7F_CAEEL      | hsp-6        |
| KARG2_CAEEL      | ZC434.8      |
| NACA_CAEEL       | icd-2        |
| PCNA_CAEEL       | pcn-1        |
| PFD2_CAEEL       | pdf-2        |
| PLBL1_CAEEL      | Y37D8A.2     |
| PLBL2_CAEEL      | F09B12.3     |
| PSA1_CAEEL       | pas-6        |
| PSA2_CAEEL       | pas-2        |
| PSA3_CAEEL       | pas-7        |
| PSA5_CAEEL       | pas-5        |
| PSA6_CAEEL       | pas-1        |
| PSA7_CAEEL       | pas-4        |
| PSB1_CAEEL       | pbs-6        |
| PURA_CAEEL       | C37H5.6      |
| RAN_CAEEL        | ran-1        |
| RIR2_CAEEL       | rnr-2        |
| RL10_CAEEL       | rpl-10       |
| RL10A_CAEEL      | rpl-1        |
| RL11_CAEEL       | rpl-11.1     |
| RL12_CAEEL       | rpl-12       |
| RL13_CAEEL       | rpl-13       |
| RL13A_CAEEL      | rpl-16       |
| RL15_CAEEL       | rpl-15       |
| RL17_CAEEL       | rpl-17       |
| RL18_CAEEL       | rpl-18       |
| RL18A_CAEEL      | rpl-20       |
| RL22_CAEEL       | rpl-22       |
| RL23_CAEEL       | rpl-23       |
| RL24_CAEEL       | rpl-24.1     |
| RL27_CAEEL       | rpl-27       |
| RL28_CAEEL       | rpl-28       |
| RL3_CAEEL        | rpl-3        |
| <b>RL4_CAEEL</b> | <b>rpl-4</b> |
| RL5_CAEEL        | rpl-5        |
| <b>RL6_CAEEL</b> | <b>rpl-6</b> |
| RL7_CAEEL        | rpl-7        |
| RL7A_CAEEL       | rpl-7A       |
| RL8_CAEEL        | rpl-2        |
| RL9_CAEEL        | rpl-9        |
| RLA1_CAEEL       | rla-1        |
| RLA2_CAEEL       | rpa-2        |

|                    |               |
|--------------------|---------------|
| RS12_CAEEL         | rps-12        |
| RS13_CAEEL         | rps-13        |
| RS14_CAEEL         | rps-14        |
| <b>RS15_CAEEL</b>  | <b>rps-15</b> |
| RS17_CAEEL         | rps-17        |
| RS19_CAEEL         | rps-19        |
| RS2_CAEEL          | rps-2         |
| RS21_CAEEL         | rps-21        |
| <b>RS23_CAEEL</b>  | <b>rps-23</b> |
| <b>RS26_CAEEL</b>  | <b>rps-26</b> |
| RS27A_CAEEL        | ubl-1         |
| RS28_CAEEL         | rps-28        |
| RS3_CAEEL          | rps-3         |
| RS3A_CAEEL         | rps-1         |
| RS4_CAEEL          | rps-4         |
| <b>RS5_CAEEL</b>   | <b>rps-5</b>  |
| <b>RS6_CAEEL</b>   | <b>rps-6</b>  |
| RS7_CAEEL          | rps-7         |
| <b>RS8_CAEEL</b>   | <b>rps-8</b>  |
| RS9_CAEEL          | rps-9         |
| RSSA_CAEEL         | rps-0         |
| SMD1_CAEEL         | snr-3         |
| <b>SODM1_CAEEL</b> | <b>sod-2</b>  |
| SUMO_CAEEL         | smo-1         |
| SYSC_CAEEL         | sars-2        |
| TCTP_CAEEL         | tct-1         |
| TDX1_CAEEL         | prdx-3        |
| TIMPL_CAEEL        | tag-225       |
| U375A_CAEEL        | C08F11.11     |
| UBIQ_UBIQ1_CAEEL   | ubq-1         |
| UBIQ_RL40_CAEEL    | ubq-2         |
| VIT1_CAEEL         | vit-1         |
| VIT2_CAEEL         | vit-2         |
| <b>VIT3_CAEEL</b>  | <b>vit-3</b>  |
| <b>VIT4_CAEEL</b>  | <b>vit-4</b>  |
| <b>VIT5_CAEEL</b>  | <b>vit-5</b>  |
| VIT6_CAEEL         | vit-6         |
| YOCA_CAEEL         | ZC395.10      |

**Table S1B.** Lower Fraction Labeled

| UniProt ID  | WB Gene Name    |
|-------------|-----------------|
| 3HAO_CAEEL  | haao-1          |
| ACBP1_CAEEL | acbp-1          |
| ACOC_CAEEL  | aco-1           |
| ACON_CAEEL  | <b>aco-2</b>    |
| ACT1_CAEEL  | act-1           |
| ACT2_CAEEL  | act-2           |
| ACT4_CAEEL  | act-4           |
| ADH1_CAEEL  | <b>sodh-1</b>   |
| ADHX_CAEEL  | H24K24.3        |
| AL7A1_CAEEL | alh-9           |
| ALF1_CAEEL  | <b>aldo-1</b>   |
| ALF2_CAEEL  | aldo-2          |
| AMPL_CAEEL  | lap-1           |
| ANC1_CAEEL  | anc-1           |
| ARP3_CAEEL  | arx-1           |
| ATPA_CAEEL  | <b>H28O16.1</b> |
| ATPB_CAEEL  | <b>atp-2</b>    |
| ATPD_CAEEL  | F58F12.1        |
| BAT45_CAEEL | bath-45         |
| CALR_CAEEL  | crt-1           |
| CISY_CAEEL  | cts-1           |
| CORO_CAEEL  | cor-1           |
| CYC21_CAEEL | cyc-2.1         |
| DEOC_CAEEL  | F09E5.3         |
| DNPEP_CAEEL | F01F1.9         |
| ECHM_CAEEL  | ech-6           |
| ENO_CAEEL   | <b>enol-1</b>   |
| F37C4_CAEEL | F37C4.5         |
| FABP6_CAEEL | <b>lbp-6</b>    |
| FAR2_CAEEL  | far-2           |
| FUMH_CAEEL  | fum-1           |
| G3P2_CAEEL  | <b>gpd-2</b>    |
| GABT_CAEEL  | gta-1           |
| GCP_CAEEL   | <b>gei-7</b>    |
| HCDH2_CAEEL | B0272.3         |
| HPPD_CAEEL  | <b>hpd-1</b>    |
| HSP7C_CAEEL | hsp-3           |
| IFB1_CAEEL  | ifb-1           |
| IMPA1_CAEEL | ttx-7           |
| IPYR_CAEEL  | pyp-1           |
| KARG1_CAEEL | F46H5.3         |

|             |          |
|-------------|----------|
| LDH_CAEEL   | ldh-1    |
| MDHM_CAEEL  | mdh-2    |
| METK1_CAEEL | sams-1   |
| MIF2_CAEEL  | mif-2    |
| MLE_CAEEL   | mlc-3    |
| MLR1_CAEEL  | mlc-1    |
| MLR2_CAEEL  | mlc-2    |
| MMSA_CAEEL  | alh-8    |
| MPI_CAEEL   | ZK632.4  |
| MSP10_CAEEL | msp-10   |
| MSP49_CAEEL | msp-49   |
| MYO4_CAEEL  | unc-54   |
| MYSP_CAEEL  | unc-15   |
| OAT_CAEEL   | C16A3.10 |
| ODO1_CAEEL  | ogdh-1   |
| ODPA_CAEEL  | T05H10.6 |
| PCCA_CAEEL  | pcca-1   |
| PDI2_CAEEL  | pdi-2    |
| PGK_CAEEL   | pgk-1    |
| PPN1_CAEEL  | mig-6    |
| PROF2_CAEEL | pfn-2    |
| SAHH_CAEEL  | ahcy-1   |
| SCOT_CAEEL  | C05C10.3 |
| SODC_CAEEL  | sod-1    |
| TBA2_CAEEL  | tba-2    |
| TBB2_CAEEL  | tbb-2    |
| TNNI2_CAEEL | unc-27   |
| TPIS_CAEEL  | tpi-1    |
| TPM1_CAEEL  | lev-11   |
| TPM3_CAEEL  | lev-11   |
| TTR15_CAEEL | ttr-15   |
| UNC87_CAEEL | unc-87   |
| VATA_CAEEL  | vha-13   |
| VATB_CAEEL  | vha-12   |
| VATF_CAEEL  | vha-9    |
| YH24_CAEEL  | lap-2    |
| YUW5_CAEEL  | F41C3.5  |
| YVRI_CAEEL  | F37H8.5  |
