# Supplementary material
Source: PubMed Central journal article supplement (PMC4492371)
Supplement: 10.1534_115.175851_genetics.115.175851-3.pdf [file 10.1534_115.175851_genetics.115.175851-3.pdf]

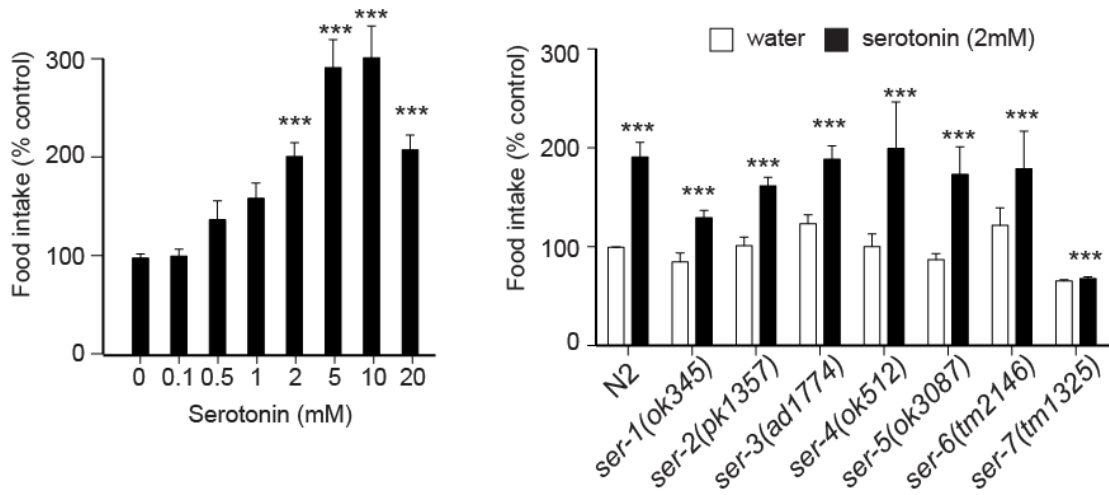

**Figure S2** Same experiments as shown in Figure 3A and C using bar plots of the mean and standard error of the mean (S.E.M) instead of the Tukey plots. Some error bars are too small to see.
