# Supplementary material
Source: PubMed Central journal article supplement (PMC4492371)
Supplement: 10.1534_115.175851_genetics.115.175851-4.pdf [file 10.1534_115.175851_genetics.115.175851-4.pdf]

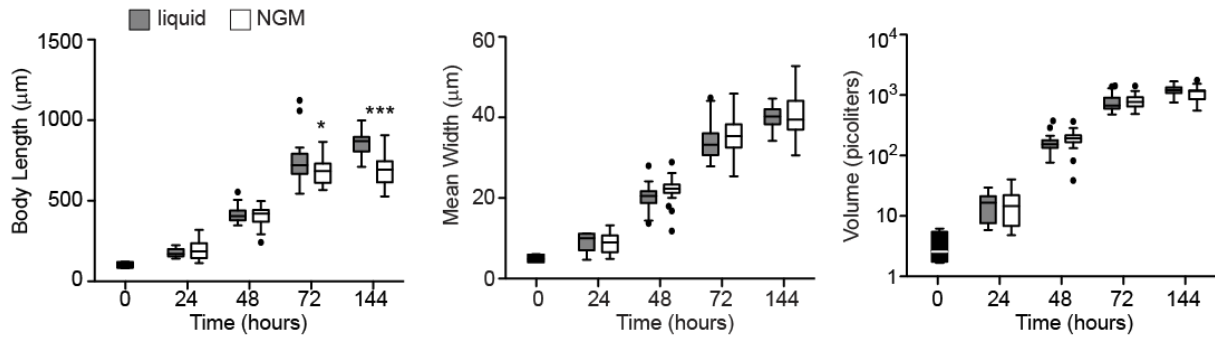

**Figure S1** Comparison of Body Size and Growth Rate of Worms Grown in Liquid Versus Solid Media. Data are representative of three independent experiments.  $N_{\text{worms}} > 20$  for each condition and all time points except at 0 hrs. For data at 0 hrs starved synchronized worms ( $N_{\text{worms}} = 5$ ) were measured prior to plating in liquid or NGM. \*\*\*  $P < 0.001$ , \*  $P < 0.05$ , Two-way ANOVA with Bonferroni post-hoc test.
