# Supplementary material
Source: PubMed Central journal article supplement (PMC4492371)
Supplement: 10.1534_115.175851_genetics.115.175851-5.pdf [file 10.1534_115.175851_genetics.115.175851-5.pdf]

## File S2

### Extended Materials and Methods

#### Part 1: Materials.

Potassium phosphate buffer, pH 6.0, 1000ml

136 g KH<sub>2</sub>PO<sub>4</sub>

Add deionized water to 900 ml

Adjust pH to 6.0 with 5M KOH

Add deionized water to 1000 ml

Autoclave

Trace metal solution

1.86 g Na<sub>2</sub>EDTA

0.69 g FeSO<sub>4</sub>·7H<sub>2</sub>O

0.20 g MnCl<sub>2</sub>·4H<sub>2</sub>O

0.29 g ZnSO<sub>4</sub>·7H<sub>2</sub>O

0.016 g CuSO<sub>4</sub>

1000 ml deionized water

Autoclave and store in the dark

S-basal medium, 1000 ml

5.9 g NaCl

50 ml 1M potassium phosphate, pH 6.0

1000 ml deionized water

Autoclave

Potassium citrate 1M, 1000 ml

268.8 g tripotassium citrate

26.3 g citric acid monohydrate

Add 900 ml deionized water

Adjust pH to 6.0 with 5M KOH

Add deionized water to 1000 ml

Autoclave

#### Part 2: Preparation of S-complete medium

S-complete medium, 1000ml

977 ml S-basal medium

10 ml 1M potassium citrate, pH 6.0 (sterile)

10 ml Trace metals solution (sterile)

3 ml 1M CaCl<sub>2</sub> (sterile)

3 ml 1M MgSO<sub>4</sub> (sterile)

1 ml 5mg/ml Cholesterol (dissolved in EtOH)
